# Supplementary material for: Nanopatterned L10-FePt nanoparticles from single-source metallopolymer precursors for potential application in ferromagnetic bit-patterned media magnetic recording
Source: Royal Society of Chemistry journal article supplement (doi:10.1039/c6py00714g), 2016-01-01
Supplement: c6py00714g1.pdf [file c6py00714g1.pdf]

# Nanopatterned L<sub>10</sub>-FePt nanoparticles from single-source metallopolymer precursors for potential application in ferromagnetic bit-patterned media magnetic recording

Zhengong Meng,<sup>a†</sup> Guijun Li,<sup>b†</sup> Sheung-Mei Ng,<sup>b</sup> Hon-Fai Wong,<sup>b</sup> Sze-Chun Yiu,<sup>a</sup> Cheuk-Lam Ho\*,<sup>a,c</sup>

Chi-Wah Leung\*,<sup>b</sup> Wai-Yeung Wong\*<sup>a,c</sup>

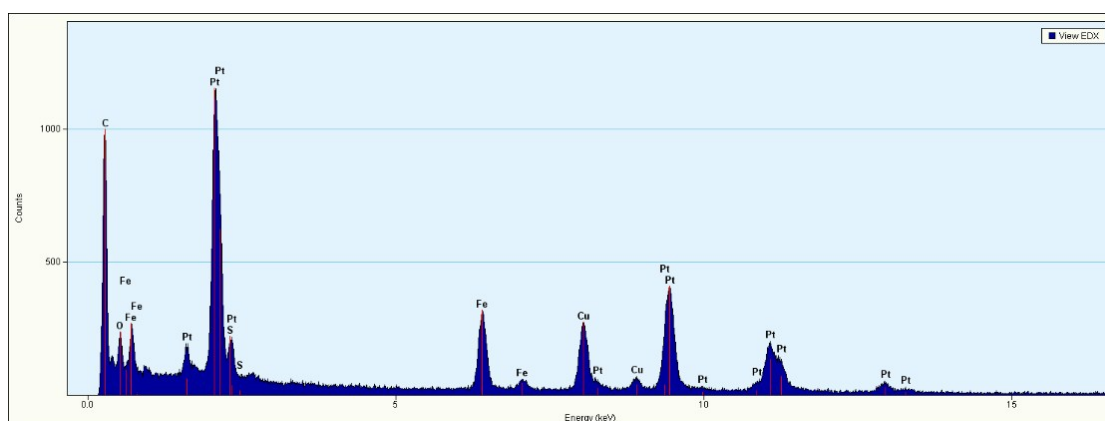

**Figure S1** EDX spectrum of the resultant FePt-1 NPs.

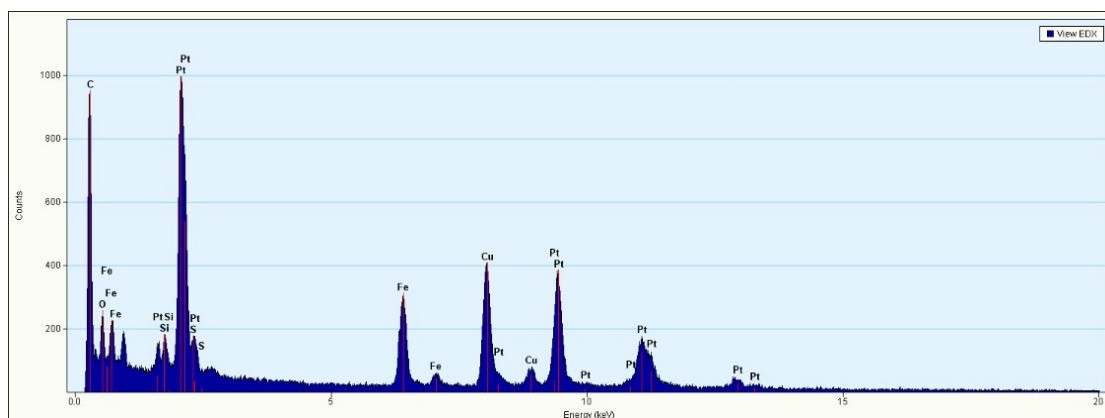

**Figure S2** EDX spectrum of the resultant FePt-2 NPs.
